# Supplementary material for: Insect-specific virus platforms for arbovirus vaccine development
Source: Frontiers journal article supplement (doi:10.3389/fimmu.2025.1521104), 2025-03-14
Supplement: Data_Sheet_2.pdf [file Data_Sheet_2.pdf]

## Supplementary Table 1

**Details for Table 1. Eilat virus (EILV) chimeric vaccines for pathogenic alphaviruses evaluated in mice and NHPs.**

| Chimera    | Animal                                  | Dose, route of administration                               | Details of vaccine induced responses and vaccine-mediated protection                                                                                                                                                                                                                                                                                                                                                | Ref |
|------------|-----------------------------------------|-------------------------------------------------------------|---------------------------------------------------------------------------------------------------------------------------------------------------------------------------------------------------------------------------------------------------------------------------------------------------------------------------------------------------------------------------------------------------------------------|-----|
| EILV/CHIKV | Mice: young C57BL/6                     | 8.8 log <sub>10</sub> PFU live or formalin-inactivated s.c. | -Neutralizing antibodies; PRNT <sub>80</sub> day 28, means of $\approx 1$ in 500 vs. $\approx 1$ in 100 for inactivated EILV/CHIKV.<br>-IFN $\gamma$ +CD8+ T cells; means of $\approx 35$ vs. $\approx 15 \times 10^4$ for inactivated.<br>-Protection from challenge; significant reduction in mean foot swelling days 3-12 post challenge.                                                                        | (1) |
|            | Mice: adult <i>Ifnar</i> <sup>-/-</sup> | 8.5 log <sub>10</sub> PFU live or formalin-inactivated s.c. | -Neutralizing antibodies; PRNT <sub>80</sub> day 28, means of $\approx 1$ in 1000 vs. $\approx 1$ in 160 for inactivated EILV/CHIKV.<br>-Protection against challenge; 100% protection against lethal challenge and significant protection against weight loss.                                                                                                                                                     |     |
|            | Mice: C57BL/6                           | 10 <sup>8</sup> PFU i.p                                     | -IgM and IgG antibodies; ELISA assays - day 14 mean ODs $\approx 0.4$ for IgM and $\approx 0.6$ for IgG vs. $\approx 0.1$ background (differences significant).<br>-Antibody secreting cells; mean of $\approx 500/10^7$ cells (background at $\approx 100/10^7$ ).<br>-IFN $\gamma$ +CD8+ T cells; peak day 28 means of $\approx 45 \times 10^4$ , background $\approx 25 \times 10^4$ (differences significant).  | (2) |
|            | NHPs ( <i>Macaca fascicularis</i> )     | 1.3 x 10 <sup>6</sup> or 1.3 x 10 <sup>8</sup> PFU i.m.     | -Neutralizing titers; mean PRNT <sub>50</sub> $\approx 2-2.5$ (log10).<br>- IgG+ B cells /10 <sup>6</sup> cells; mean of $\approx 40$ for each protein (C, E3, E2 and E1).<br>- IFN $\gamma$ ELISPOT; means of $\approx 10/10^6$ cells for each protein (C, E3, E2 and E1).<br>- Protection; adoptive transfer of serum to mice given a lethal infection – significantly delayed mortality and 20% vs. 0% survival. | (3) |
| EILV/VEEV  | Mice: CD-1                              | 10 <sup>8</sup> PFU s.c.                                    | Neutralizing antibodies; mean PRNT <sub>80</sub> $\approx 1$ in 1000 at day 6.<br>Protection; 100% survival after s.c. challenge                                                                                                                                                                                                                                                                                    | (4) |
| EILV/EEEV  | Mice: CD-1                              | 10 <sup>8</sup> PFU s.c.                                    | Neutralizing antibodies; mean PRNT <sub>80</sub> $\approx 1$ in 320 at day 28.<br>Protection; 100% survival after s.c. challenge                                                                                                                                                                                                                                                                                    |     |

## Supplementary Table 2

**Details for Table 2. Binjari virus (BinJV) chimeric vaccines for pathogenic orthoflaviviruses evaluated in mice, crocodiles and pigs.**

| Chimera    | Animal                                    | Dose, route of administration | Details of vaccine induced responses and vaccine-mediated protection                                                                                                                                                                                                                                                                                                                                                                                                                                                                                                                                                                                                                                                                                                                                                                                                                                                                                                                                                              | Ref |
|------------|-------------------------------------------|-------------------------------|-----------------------------------------------------------------------------------------------------------------------------------------------------------------------------------------------------------------------------------------------------------------------------------------------------------------------------------------------------------------------------------------------------------------------------------------------------------------------------------------------------------------------------------------------------------------------------------------------------------------------------------------------------------------------------------------------------------------------------------------------------------------------------------------------------------------------------------------------------------------------------------------------------------------------------------------------------------------------------------------------------------------------------------|-----|
| BinJV/ZIKV | Mice: Male <i>Ifnar</i> <sup>-/-</sup>    | 2 µg and 20 µg i.m.           | <p>Without Adjuvant</p> <p>-Total IgG ELISA titer at 5 weeks mean at 2 ug dose means ≈1 in 10<sup>3</sup>-10<sup>4</sup>, at 20 ug ≈1 in 2 x10<sup>4</sup> (backgrounds below detection).</p> <p>- 50% neutralizing antibody titers at 5 weeks means at 2 ug dose ≈1 in 10<sup>2</sup> (1/6 non-responders), and at 20 ug ≈2 in 2x10<sup>2</sup> (5/5 responders), (backgrounds below detection).</p> <p>-Protection; no detectable viremia and no testes damage at both doses post ZIKV challenge. No significant weight loss at 20 ug dose.</p> <p>Plus Addavax</p> <p>-Total IgG ELISA titer at 5 weeks, means at 2 ug dose ≈1 in 10<sup>3</sup>, at 20 ug ≈1 in 10<sup>4</sup> (backgrounds below detection).</p> <p>- 50% neutralizing antibody titers at 5 weeks means at 2 ug dose ≈1 in 10<sup>2</sup>, and at 20 ug ≈1 in 10<sup>2</sup>, (backgrounds below detection).</p> <p>-Protection; no detectable viremia and no testes damage at both doses post ZIKV challenge. No significant weight loss at 20 ug dose.</p> | (5) |
|            | Mice: Female <i>Ifnar</i> <sup>-/-</sup>  | 2x 10 µg and 20 µg i.m.       | <p>Without adjuvant</p> <p>-Total IgG ELISA titers at 8 weeks means at 2x10 ug dose ≈1 in 10<sup>5</sup>, at 20 ug ≈1 in 5 x10<sup>4</sup> (backgrounds below detection). No non responders.</p> <p>-50% neutralizing antibody titers at 8 weeks means at 2x10 ug dose ≈1 in 10<sup>3</sup>, at 20 ug ≈1 in 10<sup>3</sup> (backgrounds below detection).</p> <p>-Protection; no detectable viremia or weight loss for both regimens post ZIKV challenge.</p> <p>Plus Addavax</p> <p>-Total IgG ELISA titers at 5 weeks means at 20 ug dose ≈1 in 10<sup>5</sup> (backgrounds below detection). No non responders.</p> <p>-50% neutralizing antibody titers at 5 weeks means at 20 ug dose ≈1 in 10<sup>3</sup> (backgrounds below detection).</p> <p>-Protection; no detectable viremia post ZIKV challenge. Some weight loss in Addavax group.</p>                                                                                                                                                                              |     |
|            | Mice Pregnant <i>Ifnar</i> <sup>-/-</sup> | 1x 10 µg i.m.                 | <p>-Total IgG ELISA titers at 5 weeks means at 10 ug dose ≈1 in 10<sup>5</sup> (backgrounds below detection). No non responders.</p> <p>-50% neutralizing antibody titers at 5 weeks means at 10 ug dose ≈1 in 3x10<sup>2</sup> (backgrounds below detection).</p> <p>-Protection; no detectable viremia post ZIKV challenge in dams. No ZIKV RNA detected in placentas or fetal tissues at E12.5.</p>                                                                                                                                                                                                                                                                                                                                                                                                                                                                                                                                                                                                                            | (6) |
|            | Mice: Female <i>Ifnar</i> <sup>-/-</sup>  | 1x 20 µg i.m.                 | <p>-50% neutralizing antibody titers at 14 months means at 20 ug dose ≈1 in 50 with and without Addavax (backgrounds below detection).</p> <p>-Protection; no detectable viremia, significant reduction in weight loss, and 100% survival post ZIKV challenge with and without Addavax.</p>                                                                                                                                                                                                                                                                                                                                                                                                                                                                                                                                                                                                                                                                                                                                       | (7) |

|                             |                                                       |                                                      |                                                                                                                                                                                                                                                                                                                                                                                                                                                                                                                                                                                                                                                                                                                                                                                                                                                                                                                                                                         |      |
|-----------------------------|-------------------------------------------------------|------------------------------------------------------|-------------------------------------------------------------------------------------------------------------------------------------------------------------------------------------------------------------------------------------------------------------------------------------------------------------------------------------------------------------------------------------------------------------------------------------------------------------------------------------------------------------------------------------------------------------------------------------------------------------------------------------------------------------------------------------------------------------------------------------------------------------------------------------------------------------------------------------------------------------------------------------------------------------------------------------------------------------------------|------|
| BinJV/WNV <sub>KUN</sub>    | Mice: Male and female CD1                             | Live or UV inactivated, 1x and 2x 1 µg and 5 µg s.c. | <p>-Endpoint ELISA titers; at 8 weeks ranges from means of <math>\approx 1</math> in 500 (for to 1x 1 ug) to <math>\approx 1</math> in 20,000 (for 2x 1ug + adjuvant). At 5 ug doses ranges from means of <math>\approx 1</math> in 1600 (for to 1x 5 ug) to <math>\approx 1</math> in 20,000 (for 2x 5 ug + adjuvant).</p> <p>-Neutralizing antibody; at 8 weeks ranges from means of <math>\approx 1</math> in 100 (for to 1x 1 ug) to <math>\approx 1</math> in 2000 (for 2x 1ug + adjuvant). At 5 ug doses ranges from means of <math>\approx 1</math> in 400 (for to 1x 5 ug) to <math>\approx 1</math> in 2000 (for 2x 5 ug + adjuvant).</p> <p>Responses were significantly lower after UV treatment of the vaccine.</p> <p>-Protection against WNV<sub>NY99</sub> challenge; 100% survival vs. 40% survival in controls, viremia below detection, reduced weight loss and near complete prevention of disease and mortality for all formulations and doses.</p> | (8)  |
| BinJV/DENV2                 | Mice: Female AG129                                    | 2x micro-array patch.                                | <p>After 2 doses of high density microarray patch vaccination.</p> <p>-ELISA titers; IgG mean log t<sub>50</sub> of <math>\approx 4</math> (significantly higher than i.d. vaccination with 1 ug)</p> <p>-Neutralizing antibody; mean log t<sub>50</sub> of <math>\approx 2.5</math> (significantly better than i.d. vaccination with 1 ug).</p> <p>-Protection against challenge; 100% survival vs 0% for controls, &gt;1 log reduction in viremia, up to 1 log reduction in serum NS1 levels.</p>                                                                                                                                                                                                                                                                                                                                                                                                                                                                     | (9)  |
| BinJV/YFV <sub>17D</sub>    | Mice: Female <i>Ifnar</i> <sup>-/-</sup>              | 2x 5 µg, 10 µg or 20 µg of i.m.                      | <p>Plus MPLA/QS-21 adjuvant</p> <p>-50% neutralizing antibody titers at week 10, means at all doses <math>\approx 1</math> in 500 (backgrounds below detection).</p> <p>-Protection; no detectable viremia, no significant weight loss, and reductions in H&amp;E detectable liver lesions.</p>                                                                                                                                                                                                                                                                                                                                                                                                                                                                                                                                                                                                                                                                         | (10) |
| BinJV/JEV <sub>NSW/22</sub> | Mice: Female C57BL/6J and <i>Ifnar</i> <sup>-/-</sup> | 2 x 1 µg i.m                                         | <p>-Neutralizing antibody titers; means at <math>\approx 1</math> in 500 in both strains (backgrounds below detection).</p> <p>-Protection against challenge; viremia undetectable in both mouse strains, inhibition of weight loss in <i>Ifnar</i><sup>-/-</sup> mice, and spleen and brain titers reduced to below detection in <i>Ifnar</i><sup>-/-</sup> mice.</p>                                                                                                                                                                                                                                                                                                                                                                                                                                                                                                                                                                                                  | (11) |
|                             | Young pigs                                            |                                                      | Details of antibody responses and protection against challenge are not yet available (manuscript in preparation).                                                                                                                                                                                                                                                                                                                                                                                                                                                                                                                                                                                                                                                                                                                                                                                                                                                       | (12) |
| BinJV/WNV <sub>KUN</sub>    | 4 month hatchling saltwater crocodiles                | 2x 10 µg live or UV-C inactivated i.m.               | <p>-Neutralizing antibodies; at 8 week mean sof <math>\approx 1</math> in 500 end point neutralization assay for live vaccine plus adjuvant (Advax), <math>\approx 1</math> in 200 live no adjuvant, UV inactivated <math>\approx 1</math> in 60, UV inactivated plus adjuvant <math>\approx 1</math> in 100.</p> <p>-Protection against WNV skin lesions from a mean of 22 lesions for PBS controls to no detectable lesions in all vaccinated groups.</p>                                                                                                                                                                                                                                                                                                                                                                                                                                                                                                             | (13) |

### Supplementary Table 3

**Details for Table 3. Aripov virus (ARPV), YN15-283-02 virus and Chaoyang virus chimeric vaccines for pathogenic orthoflaviviruses evaluated in mice**

| Chimera         | Animal                                                                       | Dose, route of administration                    | Details of vaccine induced responses and vaccine-mediated protection                                                                                                                                                                                                                                                                                                                                                                                                   | Ref  |
|-----------------|------------------------------------------------------------------------------|--------------------------------------------------|------------------------------------------------------------------------------------------------------------------------------------------------------------------------------------------------------------------------------------------------------------------------------------------------------------------------------------------------------------------------------------------------------------------------------------------------------------------------|------|
| ARPV/ZIKV       | Mice: 4 week <i>IFN<math>\alpha</math>/<math>\beta</math>R<sup>-/-</sup></i> | 10 <sup>9</sup> genome copies (GC) s.c.          | -Neutralizing antibodies; PRNT <sub>80</sub> week 4, mean of $\approx$ 1 in 500.<br>-Protection against challenge; no detectable viremia, no significant weight loss, complete protection from mortality.                                                                                                                                                                                                                                                              | (14) |
|                 | Mice: 4 week C57BL/6                                                         |                                                  | -Neutralizing antibodies; PRNT <sub>80</sub> week 4, mean of $\approx$ 1 in 250.<br>-Protection; no detectable viremia, no significant weight loss.<br>- CD8+IFN $\gamma$ + day 35 mean $\approx$ 0.4% of splenocytes that were CD45+ cells (background $\approx$ 0.2), Th1 $\approx$ 0.65% (background $\approx$ 0.35%), Th2 $\approx$ 0.5% (background $\approx$ 0.24%). Also significant secretion of IL-2, IFN $\gamma$ and TNF after <i>in vitro</i> stimulation. |      |
|                 | Mice: dams <i>IFN<math>\alpha</math>/<math>\beta</math>R<sup>-/-</sup></i>   |                                                  | -Neutralizing antibodies; PRNT <sub>80</sub> day 29, mean of $\approx$ 1 in 300.<br>-Protection against ZIKV challenge of pregnant dams; no detectable viremia or tissue titers in dams, no significant weight loss or brain virus titers in neonates.                                                                                                                                                                                                                 |      |
|                 | Mice: 4 week C57BL/6J                                                        | 10 <sup>12</sup> GC s.c.                         | -Neutralizing antibodies; PRNT <sub>50</sub> 4 weeks, mean of $\approx$ 1 in 3500.<br>-Protection; ZIKV challenged after treatment with anti-IfnaR monoclonal antibody (MAR1-5A3), no detectable viremia. (Repeat expt in 6 week mice also showed no significant weight loss).                                                                                                                                                                                         | (15) |
|                 | Mice: 4 week C57BL/6J pups                                                   | Passive transfer                                 | Four week old pups borne to vaccinated dams.<br>-Neutralizing antibodies in pups; PRNT <sub>50</sub> 4 weeks, mean of $\approx$ 1 in 2600.<br>-Protection in pups; limited weight loss, no mortality and no detectable viremia; ZIKV challenge after MAR1-5A3 treatment.                                                                                                                                                                                               |      |
|                 | Mice: <i>IFN<math>\alpha</math>/<math>\beta</math>R<sup>-/-</sup></i>        | Passive transfer                                 | After high-dose passive transfer of serum from vaccinated C57BL/6J mice<br>-Neutralizing antibodies; PRNT <sub>50</sub> mean of $\approx$ 1 in 450.<br>-Protection; significant reduction in mortality, weight loss and viremia.<br>Also showed that T cells play a minor role in protection.                                                                                                                                                                          | (16) |
| YN15-283-02/WNV | Mice: C57BL/6                                                                | 3 x 10 <sup>6</sup> FFU i.p.                     | -ELISA antibody means titers IgG1 $\approx$ 1 in 2800, IgG2c $\approx$ 1 in 3500 day 28.<br>-Protection; significant reduction in weight loss, no detectable viremia and 100% survival.                                                                                                                                                                                                                                                                                | (17) |
| CYV/ZIKV        | Mice: <i>Ifnar<sup>-/-</sup></i>                                             | 10 <sup>4</sup> FFU s.c.                         | -Neutralizing antibodies; 50% neutralizing antibody titer day 28 mean of $\approx$ 1 in 180.<br>-Protection; reduction in serum viral RNA, 100% survival and significant reduction in body weight loss. No detectable viral RNA in brain.                                                                                                                                                                                                                              | (18) |
|                 | Mice: <i>Ifnar<sup>-/-</sup></i>                                             | Multiple bites from CYV/ZIKV infected mosquitoes | -Neutralizing antibodies; FRNT <sub>50</sub> week 5 $\approx$ 1 in 200 to 1 in 800 depending on ZIKV strain.<br>-Protection; reduction in serum viral RNA, 100% survival and significant reduction in body weight loss. Also show transmission blocking activity.                                                                                                                                                                                                      | (19) |

## References

1. Erasmus JH, Auguste AJ, Kaelber JT, Luo H, Rossi SL, Fenton K, et al. A chikungunya fever vaccine utilizing an insect-specific virus platform. *Nat Med* (2017) 23(2):192-9. doi: 10.1038/nm.4253.
2. Adam A, Luo H, Osman SR, Wang B, Roundy CM, Auguste AJ, et al. Optimized production and immunogenicity of an insect virus-based chikungunya virus candidate vaccine in cell culture and animal models. *Emerg Microbes Infect* (2021) 10(1):305-16. doi: 10.1080/22221751.2021.1886598.
3. Adam A, Woolsey C, Lu H, Plante K, Wallace SM, Rodriguez L, et al. A safe insect-based Chikungunya fever vaccine affords rapid and durable protection in cynomolgus macaques. *npj Vaccines* (2024) 9:251. doi: 10.1101/2024.05.21.595029.
4. Erasmus JH, Seymour RL, Kaelber JT, Kim DY, Leal G, Sherman MB, et al. Novel Insect-Specific Eilat Virus-Based Chimeric Vaccine Candidates Provide Durable, Mono- and Multivalent, Single-Dose Protection against Lethal Alphavirus Challenge. *J Virol* (2018) 92(4):10-1128. doi: 10.1128/JVI.01274-17.
5. Hobson-Peters J, Harrison JJ, Watterson D, Hazlewood JE, Vet LJ, Newton ND, et al. A recombinant platform for flavivirus vaccines and diagnostics using chimeras of a new insect-specific virus. *Sci Transl Med* (2019) 11(522):eaax7888. doi: 10.1126/scitranslmed.aax7888.
6. Hazlewood JE, Rawle DJ, Tang B, Yan K, Vet LJ, Nakayama E, et al. A Zika Vaccine Generated Using the Chimeric Insect-Specific Binjari Virus Platform Protects against Fetal Brain Infection in Pregnant Mice. *Vaccines (Basel)* (2020) 8(3):496. doi: 10.3390/vaccines8030496.
7. Hazlewood JE, Tang B, Yan K, Rawle DJ, Harrison JJ, Hall RA, et al. The Chimeric Binjari-Zika Vaccine Provides Long-Term Protection against ZIKA Virus Challenge. *Vaccines (Basel)* (2022) 10(1):85. doi: 10.3390/vaccines10010085.
8. Vet LJ, Setoh YX, Amarilla AA, Habarugira G, Suen WW, Newton ND, et al. Protective Efficacy of a Chimeric Insect-Specific Flavivirus Vaccine against West Nile Virus. *Vaccines* (2020) 8(2):258. doi: 10.3390/vaccines8020258.
9. Choo JJY, Vet LJ, McMillan CLD, Harrison JJ, Scott CAP, Depelsenair ACI, et al. A chimeric dengue virus vaccine candidate delivered by high density microarray patches protects against infection in mice. *npj Vaccines* (2021) 6(1):66. doi: 10.1038/s41541-021-00328-1.
10. Yan K, Vet LJ, Tang B, Hobson-Peters J, Rawle DJ, Le TT, et al. A Yellow Fever Virus 17D Infection and Disease Mouse Model Used to Evaluate a Chimeric Binjari-Yellow Fever Virus Vaccine. *Vaccines (Basel)* (2020) 8(3):368. doi: 10.3390/vaccines8030368.
11. Harrison JJ, Nguyen W, Morgan MS, Tang B, Habarugira G, de Malmanche H, et al. A chimeric vaccine derived from Australian genotype IV Japanese encephalitis virus protects mice from lethal challenge. *NPJ Vaccines* (2024) 9(1):134. doi: 10.1038/s41541-024-00903-2.
12. UQ\_News. Vaccine to protect pigs from Japanese encephalitis virus. <https://www.uq.edu.au/news/article/2023/02/vaccine-protect-pigs-japanese-encephalitis-virus>. Accessed Oct 2024.
13. Habarugira G, Harrison JJ, Moran J, Suen WW, Colmant AMG, Hobson-Peters J, et al. A chimeric vaccine protects farmed saltwater crocodiles from West Nile virus-induced skin lesions. *npj Vaccines* (2023) 8(1):93. doi: 10.1038/s41541-023-00688-w.
14. Porier DL, Wilson SN, Auguste DI, Leber A, Coutermarsh-Ott S, Allen IC, et al. Enemy of my enemy: a novel insect-specific flavivirus offers a promising platform for a Zika virus vaccine. *Vaccines* (2021) 9(10):1142.
15. Tanelus M, López K, Smith S, Muller JA, Porier DL, Auguste DI, et al. Exploring the immunogenicity of an insect-specific virus vectored Zika vaccine candidate. *Scientific Reports* (2023) 13(1):19948. doi: 10.1038/s41598-023-47086-9.
16. Porier DL, Adam A, Kang L, Michalak P, Tupik J, Santos MA, et al. Humoral and T-cell-mediated responses to an insect-specific flavivirus-based Zika virus vaccine candidate. *PLOS Pathogens* (2024) 20(10):e1012566. doi: 10.1371/journal.ppat.1012566.
17. Zhang HQ, Li N, Zhang ZR, Deng CL, Xia H, Ye HQ, et al. A Chimeric Classical Insect-Specific Flavivirus Provides Complete Protection Against West Nile Virus Lethal Challenge in Mice. *J Infect Dis* (2024) 229(1):43-53. doi: 10.1093/infdis/jiad238.
18. Dong H-L, Chen Z-L, He M-J, Cui J-Z, Cheng H, Wang Q-Y, et al. The Chimeric Chaoyang-Zika Vaccine Candidate Is Safe and Protective in Mice. *Vaccines* (2024) 12(2):215.

19. Wen D, Ding LS, Zhang Y, Li X, Zhang X, Yuan F, et al. Suppression of flavivirus transmission from animal hosts to mosquitoes with a mosquito-delivered vaccine. *Nature Communications* (2022) 13(1):7780. doi: 10.1038/s41467-022-35407-x.
